# Supplementary material for: A phenazine-based conjugated microporous polymer as a high performing cathode for aluminium–organic batteries
Source: Royal Society of Chemistry journal article supplement (doi:10.1039/d3fd00132f), 2023-08-16
Supplement: d3fd00132f1.pdf [file d3fd00132f1.pdf]

## Supporting Information

### A phenazine-based conjugated microporous polymer as high performing cathode for aluminium-organic batteries

Rebecca Grieco<sup>a</sup>, Olivera Luzanin<sup>b,c</sup>, Diego Alvan<sup>a</sup>, Marta Liras<sup>d</sup>, Robert Dominko<sup>b,c,e</sup>, Nagaraj Patil<sup>a</sup>, Jan Bitenc<sup>b,c,\*</sup>, and Rebeca Marcilla<sup>a\*</sup>

[a] Electrochemical Processes Unit, IMDEA Energy Institute, Avda. Ramón de la Sagra 3, 28935 Móstoles, Spain

[b] National Institute of Chemistry, Hajdrihova 19, 1000, Ljubljana, Slovenia

[c] Faculty of Chemistry and Chemical Technology, University of Ljubljana, Večna pot 113, 1000 Ljubljana, Slovenia

[d] Photoactivated Processes Unit, IMDEA Energy Institute, Avda. Ramón de la Sagra 3, 28935 Móstoles, Spain

[e] Alistore-European Research Institute, CNRS FR 3104, Hub de l'Energie, Rue Baudelocque, 80039 Amiens, France

**\*Corresponding Author(s)**

E-mail: [rebeca.marcilla@imdea.org](mailto:rebeca.marcilla@imdea.org), [Jan.Bitenc@ki.si](mailto:Jan.Bitenc@ki.si)

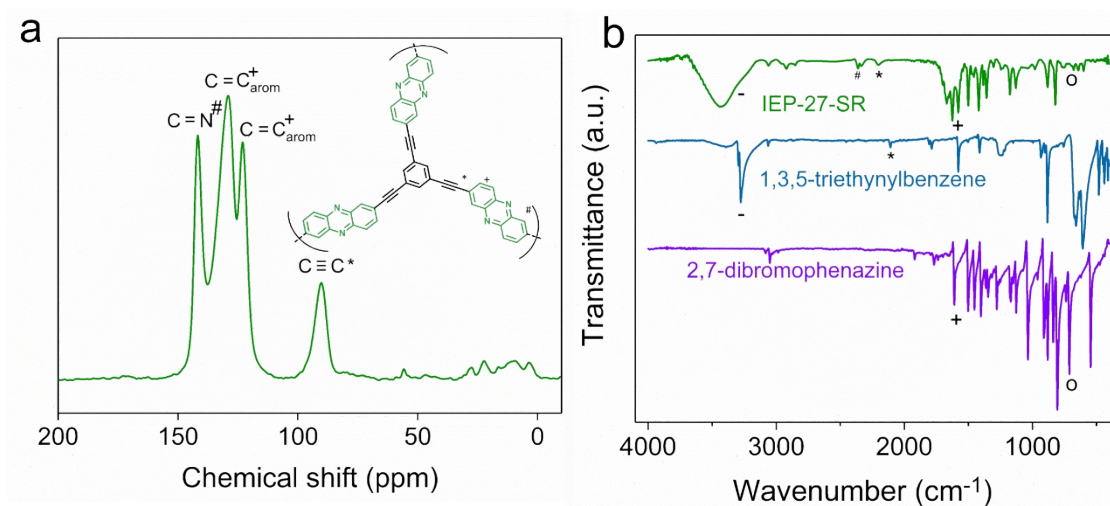

Figures S1. (a)  $^{13}\text{C}$  Solid-state NMR of IEP-27-SR. (b) FTIR on IEP-27-SR and monomers made on KBr pellets (Legends are - :  $\text{C}\equiv\text{C}-\text{H}$ , # :  $\text{CO}_2$  ambiental, \* :  $\text{C}\equiv\text{C}$ , + :  $\text{C}=\text{N}$ , o :  $\text{C}-\text{Br}$ ), (c) TEM picture at 1  $\mu\text{m}$  bar scale.

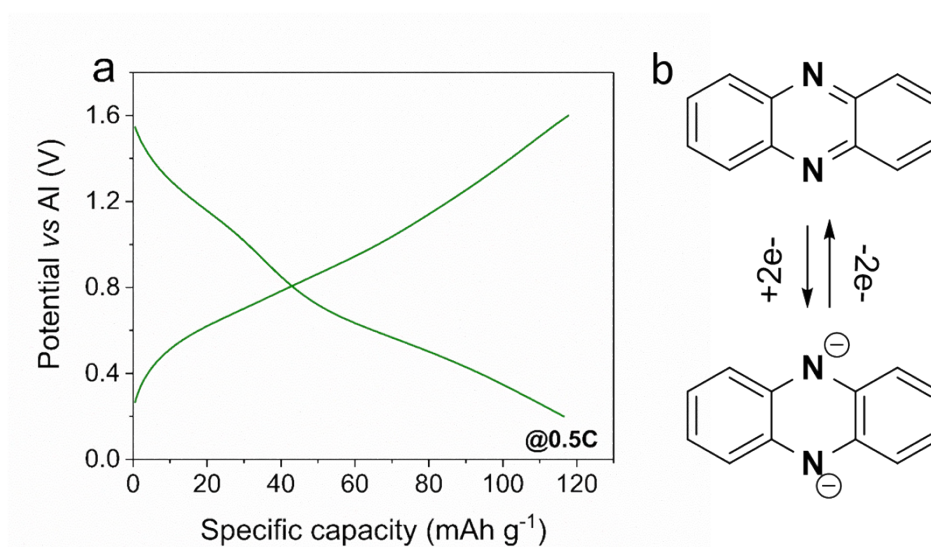

Figures S2. (a) Galvanostatic test for *ex situ* ATR at 0.5C. (b) Depiction of the generic conversion mechanism of phenazine.

Since carbon additives were included during the synthesis of the IEP-27-SR hybrid (SWCNT and RGO) and an extra amount is added during the preparation of the buckypaper electrodes (SWCNTs), we evaluated the carbon contribution to the total capacity. Long-term galvanostatic charge-discharge cycling (GCD) was performed at 2C on buckypaper with similar mass loading, but containing only SWCNTs and RGO (GCD profile and cyclability are shown in Figure S5). Since the capacity attributed to carbon additives was found to be only 22 mAh g<sup>-1</sup>, we could assess that most of the capacity is given by the phenazine active units. For this reason, the carbon contribution was considered in this work minor and was not subtracted from the specific capacity values obtained for the Al//IEP-27-SR experiments and reported in this work, to allow the comparison with the state of art.

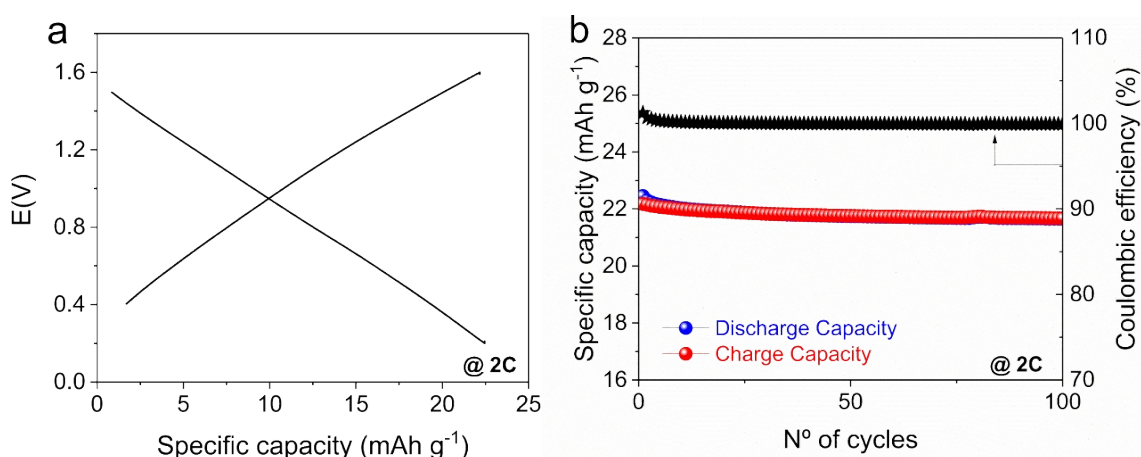

Figure S3. Carbon contribution. (a) GPC at 2C and (b) cycling (100 cycles) of the carbon electrode. Capacity contribution from the carbon was found to be 22 mAh g<sup>-1</sup>.

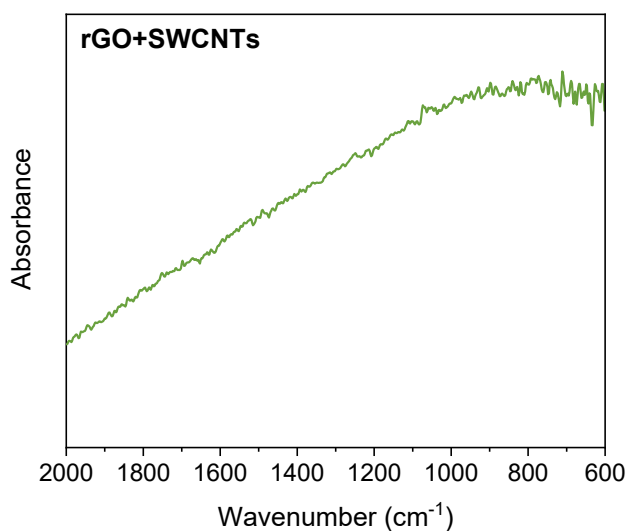

Figure S4. ATR spectra of only carbon (RGO + SWCNTs). No peaks are observed.

Table S1. *Ex situ* EDS data for the Pristine, Soaked, Discharged and Charged electrodes in atomic percents. It be noted that the values reported are the average values obtained over 5 different areas on specific electrodes.

|                   | C     | O    | N    | Al   | Si   | Cl   | Fe   | Cu   | Br   | Pd   |
|-------------------|-------|------|------|------|------|------|------|------|------|------|
| <b>Pristine</b>   | 92.08 | 3.92 | 3.38 | -    | 0.07 | 0.02 | 0.03 | 0.10 | 0.38 | 0.02 |
| <b>Soaked</b>     | 89.32 | 6.95 | 2.89 | 0.20 | 0.30 | 0.17 | 0.03 | 0.04 | 0.04 | 0.01 |
| <b>Discharged</b> | 91.50 | 2.89 | 2.54 | 0.87 | 0.07 | 2.00 | 0.04 | 0.03 | 0.04 | 0.02 |
| <b>Charged</b>    | 85.03 | 9.12 | 2.69 | 0.25 | 0.03 | 0.22 | 0.01 | 0.04 | 0    | 0    |

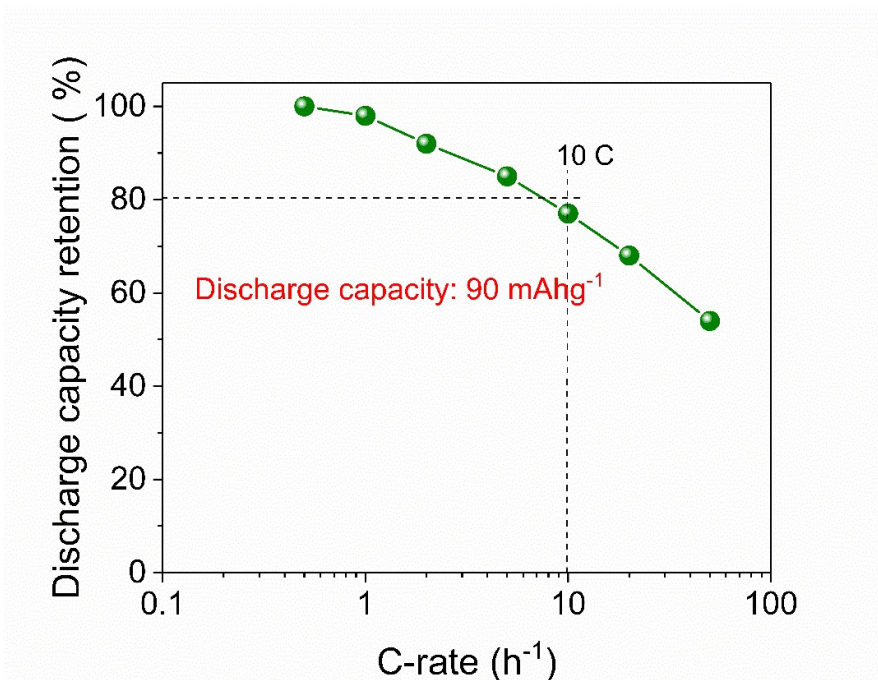

Figure S5. Discharge capacity retention vs C-rate for Al//IEP-27-SR cell in the AlCl<sub>3</sub>/EMIMCl electrolyte

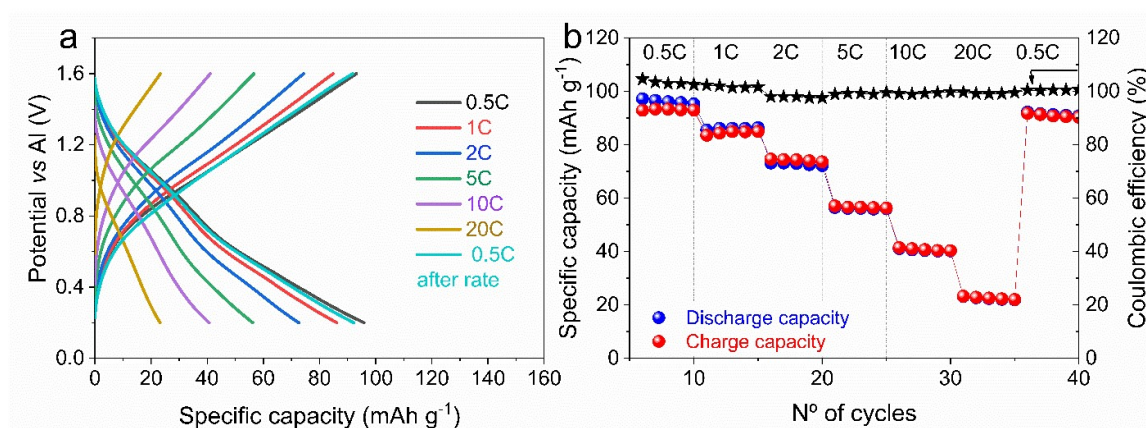

Figure S6. GCDs profiles of Al//IEP-27-SR cell in AlCl<sub>3</sub>: urea (1.3:1.0, molar ratio) at different current densities. (a) Al//IEP-27-SR cell profiles. (b) Stability and CE (%) at different current densities.



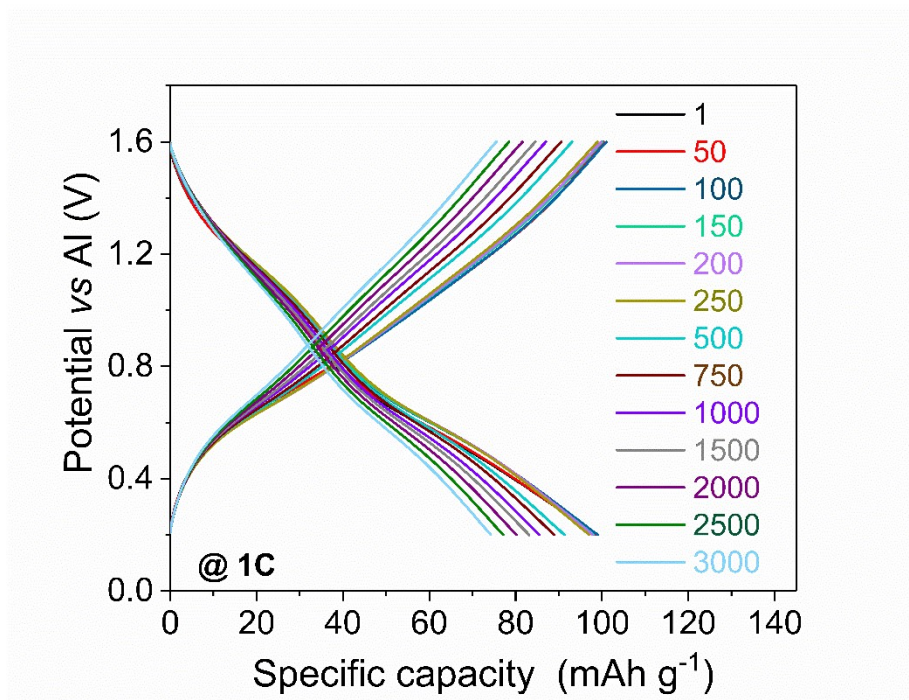

Figure S7. GCDs profiles at 1C from cycle 1 to cycle 3000 in in the  $\text{AlCl}_3/\text{EMIMCl}$  electrolyte.

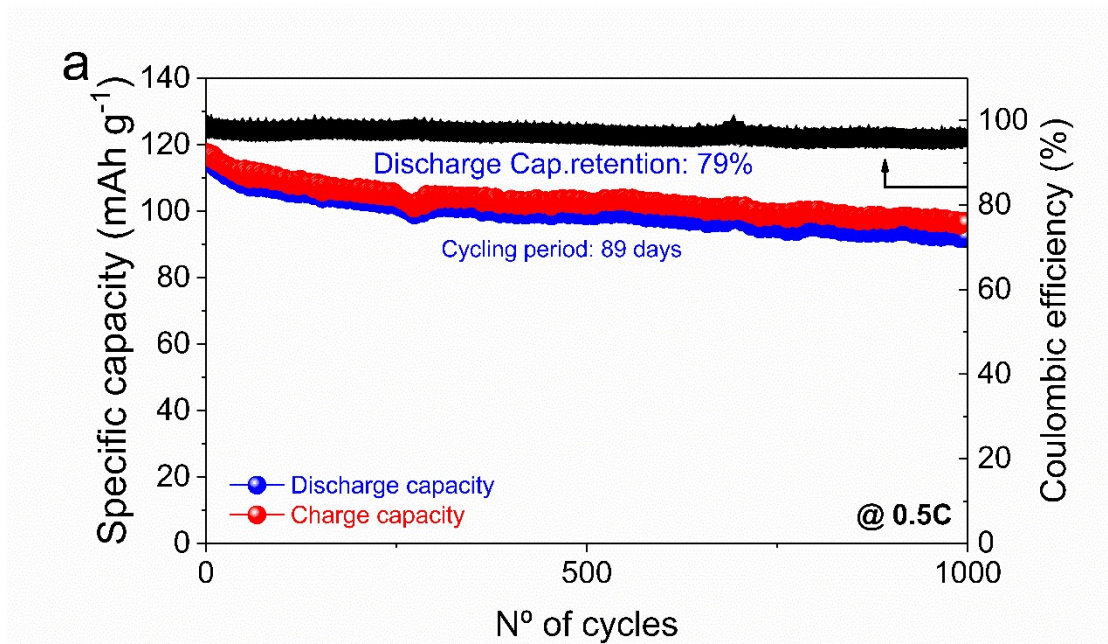

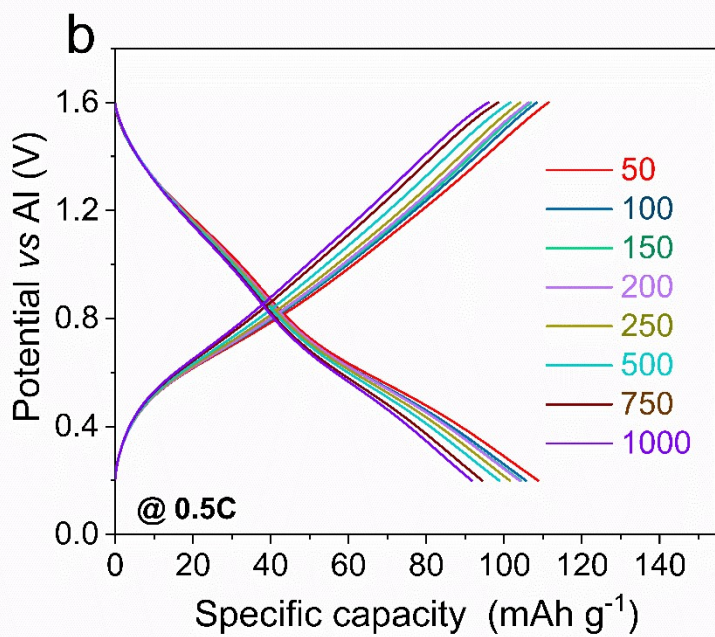

Figure S8. (a) Long cycling at 0.5C for 1000 cycles (corresponding to 89 days of cycling). (b) Charge-discharge profiles at the same current density for different selected cycles.

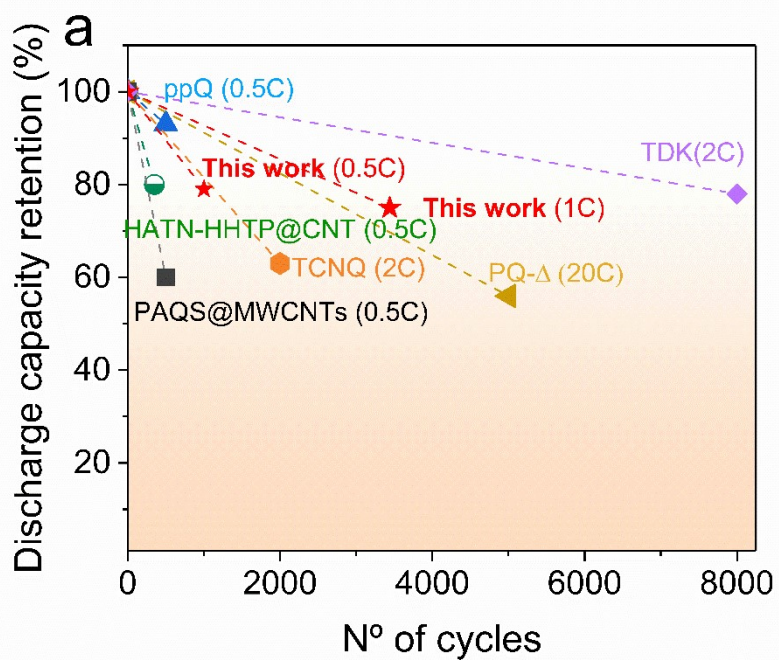

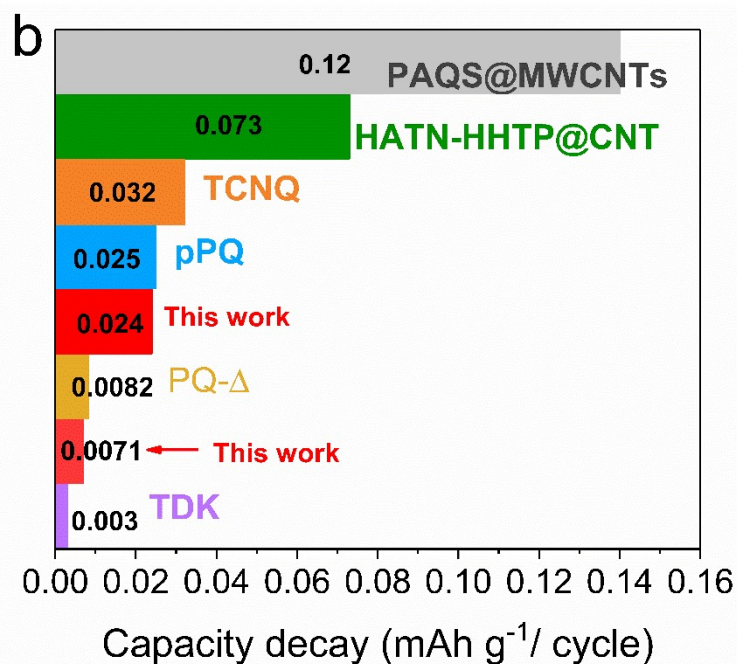

Figure S9. Comparison with the state-of-the-art: (a) discharge capacity retention vs cycle number. (b) Capacity decay per cycle. For this comparison have been selected only some examples from the literature (n-type): “p-type” and “bipolar” types polymers have been excluded. All the examples used for this comparison are reported in Table S2 and are listed here with the respective reference numbers: PAQS@MWCNTs,(1) HATN-HHTP@CNT,(2) TCNQ,(3) ppQ,(4) PQ- Δ,(5) TDK.(6)

Table S2. Table with the most representative examples of RABs with n-type organic cathode materials applied in  $\text{AlCl}_3\text{:}[\text{EMIm}]\text{Cl}$  electrolyte

| Organic cathode                            | Electrode composition and Active material mass loading* <sup>1</sup>          | C-max, number of cycles, current density, $C_{\text{ret}}\%$ and number of days <sup>2</sup>            | Rate capability (capacity at max applied current and retention %) |
|--------------------------------------------|-------------------------------------------------------------------------------|---------------------------------------------------------------------------------------------------------|-------------------------------------------------------------------|
| <p><b>pPQ(4)</b></p>                       | <p>60 : 30 : 10<br/>AM: Printex XE2 CB:<br/>PTFE<br/>2 mg cm<sup>-2</sup></p> | <p>168 mAh g<sup>-1</sup> at 0.5C<br/>500 cycles at 0.5C<br/>93% ~52 days</p>                           | <p>8 mAhg<sup>-1</sup><br/>20C<br/>6%</p>                         |
| <p><b>PAQS/MWCNT(1)</b></p>                | <p>60 : 30 : 10<br/>AM: Printex XE2 CB:<br/>PTFE<br/>2 mg cm<sup>-2</sup></p> | <p>190 mAh g<sup>-1</sup> at 0.5C<br/>500 cycles at 0.5C<br/>60% ~41 days</p>                           | <p>130 mAhg<sup>-1</sup><br/>10C<br/>69%</p>                      |
| <p><b>PANI(H<sup>+</sup>)@SWCNT(7)</b></p> | <p>65 : 35<br/>PANI:SWCNTS<br/>1.1 mg cm<sup>-2</sup></p>                     | <p>200 mAh g<sup>-1</sup> at 1 A g<sup>-1</sup><br/>8000 cycles at 10 A g<sup>-1</sup><br/>87.6% //</p> | <p>45 mAhg<sup>-1</sup><br/>40 A g<sup>-1</sup><br/>22.5%</p>     |

|                                                                                                                            |                                                                                                         |                                                                                                                                        |                                                                            |
|----------------------------------------------------------------------------------------------------------------------------|---------------------------------------------------------------------------------------------------------|----------------------------------------------------------------------------------------------------------------------------------------|----------------------------------------------------------------------------|
| <p><b>PQ-Δ (5)</b></p> 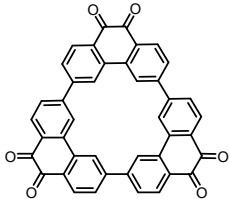                   | <p>30: 60: 10<br/>AM: Denka black:<br/>PVDF<br/>0.5mg cm<sup>-2</sup></p>                               | <p>110 mAh g<sup>-1</sup> at 1C<br/>5000 cycles at 20C<br/>56% ~11 days</p>                                                            | <p>70 mAhg<sup>-1</sup><br/>100C<br/>64%</p>                               |
| <p><b>HATN-HHTP@CNT<br/>(40%)(2)</b></p>  | <p>80: 10: 10<br/>HHTP@CNT (40%):<br/>acetylene black:<br/>sodium alginate<br/>1 mg cm<sup>-2</sup></p> | <p>128 mA h g<sup>-1</sup> at 100 mA g<sup>-1</sup><br/>(~0.5C)<br/>350 cycles at 100 mA g<sup>-1</sup><br/>80% ~29 days</p>           | <p>110 mA h g<sup>-1</sup><br/>200 mA g<sup>-1</sup><br/>(~1C)<br/>86%</p> |
| <p><b>TCNQ(3)</b></p>                     | <p>60 : 30 : 10<br/>AM:<br/>acetylene black:<br/>PVDF<br/>0.5 mg cm<sup>-2</sup></p>                    | <p>180 mAh g<sup>-1</sup><br/>at 500 mA g<sup>-1</sup> (~2C)<br/>2000 cycles at 500 mA g<sup>-1</sup><br/>63% ~55 days</p>             | <p>100 mAhg<sup>-1</sup><br/>500 mA g<sup>-1</sup><br/>(~2C)<br/>83%</p>   |
| <p><b>TDK(6)</b></p>                    | <p>50:40:10<br/>AM: conductive agent:<br/>PVDF<br/>1.5 mg cm<sup>-2</sup></p>                           | <p>226 mAh g<sup>-1</sup> at 100 mA g<sup>-1</sup><br/>(~0.25C)<br/>8000 cycles at 1 A g<sup>-1</sup><br/>(~2.5C)<br/>78% ~65 days</p> | <p>66 mAh g<sup>-1</sup><br/>2A g<sup>-1</sup><br/>(~5C)<br/>36%</p>       |
| <p><b>PI-MOF(8)</b></p>                 | <p>70 :20: 10<br/>Pi-MOF : Ketjenblack:<br/>PVDF<br/>1.7 mg cm<sup>-2</sup></p>                         | <p>83 mAh g<sup>-1</sup> at 1 A g<sup>-1</sup><br/>1800 cycles<br/>at 1 A g<sup>-1</sup><br/>87% //</p>                                | <p>40 mA h g<sup>-1</sup><br/>10 A g<sup>-1</sup><br/>43%</p>              |
| <p><b>IEP-27-SR (this work)</b></p>     | <p>50 : 50<br/>IEP-27: SWCNTs<br/>(47%):RGO(3.5%)<br/>1 mg cm<sup>-2</sup></p>                          | <p>116 mAh g<sup>-1</sup> at 0.5C<br/>3440 cycles at 1C<br/>75% ~127 days<br/>1000 cycles at 0.5C<br/>79% ~89 days</p>                 | <p>50C<br/>62 mAh g<sup>-1</sup><br/>54%</p>                               |

\*1 Active material mass loading is calculated considering the amount of polymer excluding any carbon contribution, also in the case of hybrid materials.

\*2Duration of the cycling expressed as cycling period (days) is calculated considering the C-rate and multiplying the theoretical time by the Capacity utilization (%) at the first cycle and at final cycle and considering the average value. The calculation was possible only when the C-rate was



given or when was possible to convert current density from A/g to C-rate using the theoretical capacity.

#### References:

1. Bitenc J, Lindahl N, Vizintin A, Abdelhamid ME, Dominko R, Johansson P. Concept and electrochemical mechanism of an Al metal anode – organic cathode battery. *Energy Storage Mater.* 2020;24(June 2019):379–83.
2. Li S, Liu Y, Dai L, Li S, Wang B, Xie J, et al. A stable covalent organic framework cathode enables ultra-long cycle life for alkali and multivalent metal rechargeable batteries. *Energy Storage Mater.* 2022 Jun 1;48:439–46.
3. Guo F, Huang Z, Wang M, Song W-L, Lv A, Han X, et al. Active cyano groups to coordinate  $AlCl_2^+$  cation for rechargeable aluminum batteries. *Energy Storage Mater.* 2020 Dec;33(June):250–7.
4. Bitenc J, Košir U, Vizintin A, Lindahl N, Krajnc A, Pirnat K, et al. Electrochemical Mechanism of Al Metal–Organic Battery Based on Phenanthrenequinone. *Energy Mater Adv.* 2021 Jan 1;2021:9.
5. Kim DJ, Yoo DJ, Otley MT, Prokofjevs A, Pezzato C, Owczarek M, et al. Rechargeable aluminium organic batteries. *Nat Energy.* 2019;4(1):51–9.
6. Yoo DJ, Heeney M, Glöcklhofer F, Choi JW. Tetradiketone macrocycle for divalent aluminium ion batteries. *Nat Commun.* 2021;12(1):1–9.
7. Wang S, Huang S, Yao M, Zhang Y, Niu Z. Engineering Active Sites of Polyaniline for  $AlCl_2^+$  Storage in an Aluminum-Ion Battery. *Angew Chemie - Int Ed.* 2020 Jul 13;59(29):11800–7.
8. Zhou J, Yu X, Zhou J, Lu B. Polyimide/metal-organic framework hybrid for high performance Al - Organic battery. *Energy Storage Mater.* 2020;31(June):58–63.
